# Supplementary material for: Application of targeted1H NMR profiling to assess the seed vitality of soybean [Glycine max (L.) Merr.]
Source: Royal Society of Chemistry journal article supplement (doi:10.1039/c6ay02867e), 2017-01-01
Supplement: c6ay02867e1.pdf [file c6ay02867e1.pdf]

## SUPPORTING INFORMATION

### Application of targeted <sup>1</sup>H NMR profiling to assess the seed vitality of soybean [*Glycine max* (L.) Merr.]

Wen-Ting Qin,<sup>a,1</sup> Cai-qiong Yang,<sup>a,1</sup> Nasir Iqbal,<sup>a</sup> Jun-cai Deng,<sup>a</sup> Jing Zhang,<sup>a,c</sup> Kai Shu,<sup>a,b</sup>  
Jun-bo Du,<sup>a,b</sup> Feng Yang,<sup>a</sup> Wen-yu Yang<sup>\*a</sup> and Jiang Liu<sup>\*a,b</sup>

<sup>a</sup> Key Laboratory of Crop Ecophysiology and Farming System in Southwest, Ministry of Agriculture, Chengdu 611130, China

<sup>b</sup> Institute of Ecological Agriculture, Sichuan Agricultural University, Chengdu 611130, China

<sup>c</sup> College of Horticulture, Sichuan Agricultural University, Chengdu 611130, China

#### Appendix A. Supplementary data

Table S1 Metabolite identification in the soybean seed

Table S2 All metabolites identified in soybean seed, showing their molecular masses, KEGG compound codes, and other corresponding information.

Fig. S1 Representative <sup>1</sup>H NMR spectra of 50% water-methanolic extracts of soybean seed.

\* Corresponding author. Tel.: +28 86290960; fax: +28 86290870.

E-mail address: jiangliu@sicau.edu.cn (J. Liu), mssiyangwy@sicau.edu.cn (W.-Y. Yang).

<sup>1</sup> These authors contributed equally to this work.

Table S1 Metabolite identification in the soybean seed.

| No. | Compound name          | No. | Compound name      |
|-----|------------------------|-----|--------------------|
| 1   | 1,3-Dimethylurate      | 23  | Leucine            |
| 2   | 2-Aminoadipate         | 24  | Lysine             |
| 3   | 2-Hydroxyisobutyrate   | 25  | Malate             |
| 4   | 4-Aminobutyrate        | 26  | Malonate           |
| 5   | 4-Hydroxyphenylacetate | 27  | Methionine         |
| 6   | Acetate                | 28  | N-Acetylglutamate  |
| 7   | Alanine                | 29  | Pantothenate       |
| 8   | Arginine               | 30  | Phenylacetate      |
| 9   | Asparagine             | 31  | Phenylalanine      |
| 10  | Aspartate              | 32  | Proline            |
| 11  | Betaine                | 33  | Propylene glycol   |
| 12  | Carnitine              | 34  | Pyruvate           |
| 13  | Choline                | 35  | Serine             |
| 14  | Citrate                | 36  | Succinate          |
| 15  | Ethanol                | 37  | Sucrose            |
| 16  | Formate                | 38  | Threonine          |
| 17  | Fumarate               | 39  | Tryptophan         |
| 18  | Glucose                | 40  | Tyrosine           |
| 19  | Glutamate              | 41  | Uracil             |
| 20  | Glutamine              | 42  | Valine             |
| 21  | Isoleucine             | 43  | pi-Methylhistidine |
| 22  | Lactate                | 44  | Epicatechin        |

Table S2 All metabolites identified in soybean seed, showing their molecular masses, KEGG compound codes, and other corresponding information.

| Compound               | CAS. Registry | ChEBI. ID   | Compound. ID | Formula    | HMDB.Access ion. Number | KEGG.Compound. ID | PubChem. Compound | Weight   |
|------------------------|---------------|-------------|--------------|------------|-------------------------|-------------------|-------------------|----------|
| 1,3-Dimethylurate      | 944-73-0      |             | 346          | C7H8N4O3   | HMDB01857               |                   | 70346             | 196.1634 |
| 2-Hydroxyisobutyrate   | 594-61-6      |             | 69           | C4H8O3     | HMDB00729               |                   | 11671             | 104.1045 |
| 4-Aminobutyrate        | 1956-12-2     | CHEBI:16865 | 101          | C4H9NO2    | HMDB00112               | C00334            | 119               | 103.1198 |
| 4-Hydroxyphenylacetate | 156-38-7      | CHEBI:18101 | 7            | C8H8O3     | HMDB00020               | C00642            | 127               | 152.1473 |
| Acetate                | 64-19-7       | CHEBI:15366 | 9            | C2H4O2     | HMDB00042               | C00033            | 176               | 60.052   |
| Adenine                | 73-24-5       | CHEBI:16708 | 272          | C5H5N5     | HMDB00034               | C00147            | 190               | 135.1267 |
| Adenosine              | 58-61-7       | CHEBI:16335 | 276          | C10H13N5O4 | HMDB00050               | C00212            | 60961             | 267.2413 |
| Alanine                | 56-41-7       | CHEBI:16977 | 232          | C3H7NO2    | HMDB00161               | C00041            | 5950              | 89.0932  |
| Arginine               | 74-79-3       | CHEBI:16467 | 240          | C6H14N4O2  | HMDB00517               | C00062            | 6322              | 174.201  |
| Asparagine             | 70-47-3       | CHEBI:17196 | 231          | C4H8N2O3   | HMDB00168               | C00152            | 6267              | 132.1179 |
| Aspartate              | 56-84-8       | CHEBI:17053 | 234          | C4H7NO4    | HMDB00191               | C00049            | 5960              | 133.1027 |
| Betaine                | 107-43-7      | CHEBI:17750 | 15           | C5H11NO2   | HMDB00043               | C00719            | 248               | 117.1463 |
| Choline                | 62-49-7       | CHEBI:15354 | 302          | C5H14NO    | HMDB00097               | C00114            | 305               | 104.1708 |
| Citrate                | 77-92-9       | CHEBI:30769 | 22           | C6H8O7     | HMDB00094               | C00158            | 311               | 192.1235 |
| Dimethyl sulfone       | 67-71-0       | CHEBI:9349  | 3211         | C2H6O2S    | HMDB04983               | C11142            | 6213              | 94.1328  |
| Epicatechin            | 490-46-0      |             | 2            | C15H14O6   | HMDB01871               | C09727            | 72276             | 290.2681 |
| Ethanolamine           | 141-43-5      | CHEBI:16000 | 97           | C2H7NO     | HMDB00149               | C00189            | 700               | 61.0831  |
| Formate                | 64-18-6       | CHEBI:30751 | 32           | CH2O2      | HMDB00142               | C00058            | 284               | 46.0254  |
| Fumarate               | 110-17-8      | CHEBI:18012 | 100          | C4H4O4     | HMDB00134               | C00122            | 723               | 116.0722 |
| Galactarate            | 526-99-8      | CHEBI:30852 | 396          | C6H10O8    | HMDB00639               | C00879            | 607               | 210.1388 |
| Glucarate              | 87-73-0       | CHEBI:16002 | 398          | C6H10O8    | HMDB00663               | C00818            | 33037             | 210.1388 |
| Glutamate              | 56-86-0       | CHEBI:16015 | 229          | C5H9NO4    | HMDB00148               | C00025            | 33032             | 147.1293 |
| Hypoxanthine           | 68-94-0       | CHEBI:17368 | 164          | C5H4N4O    | HMDB00157               | C00262            | 790               | 136.1115 |

|                             |            |             |     |            |           |        |        |          |
|-----------------------------|------------|-------------|-----|------------|-----------|--------|--------|----------|
| Isoleucine                  | 73-32-5    | CHEBI:17191 | 225 | C6H13NO2   | HMDB00172 | C00407 | 6306   | 131.1729 |
| Isopropanol                 | 67-63-0    | CHEBI:17824 | 72  | C3H8O      | HMDB00863 | C01845 | 3776   | 60.095   |
| Lactate                     | 79-33-4    | CHEBI:422   | 42  | C3H6O3     | HMDB00190 | C00186 | 107689 | 90.0779  |
| Leucine                     | 61-90-5    | CHEBI:15603 | 235 | C6H13NO2   | HMDB00687 | C00123 | 6106   | 131.1729 |
| Malate                      | 6915-15-7  | CHEBI:6650  | 94  | C4H6O5     | HMDB00156 | C00711 | 525    | 134.0874 |
| Malonate                    | 141-82-2   | CHEBI:30794 | 121 | C3H4O4     | HMDB00691 | C00383 | 867    | 104.0615 |
| Methionine                  | 63-68-3    | CHEBI:16643 | 213 | C5H11NO2S  | HMDB00696 | C00073 | 6137   | 149.2113 |
| myo-Inositol                | 87-89-8    | CHEBI:17268 | 223 | C6H12O6    | HMDB00211 | C00137 | 892    | 180.1559 |
| <i>O</i> -Phosphocholine    | 107-73-3   | CHEBI:18132 | 321 | C5H15NO4P  | HMDB00284 | C00588 | 1014   | 184.1507 |
| Propylene glycol            | 57-55-6    | CHEBI:16997 | 262 | C3H8O2     | HMDB01881 | C00583 | 1030   | 76.0944  |
| sn-Glycero-3-phosphocholine | 28319-77-9 | CHEBI:16870 | 333 | C8H21NO6P  | HMDB00086 | C00670 | 439285 | 258.2292 |
| Succinate                   | 110-15-6   | CHEBI:15741 | 60  | C4H6O4     | HMDB00254 | C00042 | 1110   | 118.088  |
| Sucrose                     | 57-50-1    | CHEBI:17992 | 193 | C12H22O11  | HMDB00258 | C00089 | 5988   | 342.2965 |
| Trigonelline                | 535-83-1   | CHEBI:18123 | 334 | C7H7NO2    | HMDB00875 | C01004 | 5571   | 137.136  |
| Trimethylamine              | 75-50-3    | CHEBI:18139 | 62  | C3H9N      | HMDB00906 | C00565 | 1146   | 59.1103  |
| Tryptophan                  | 73-22-3    | CHEBI:16828 | 241 | C11H12N2O2 | HMDB00929 | C00078 | 6305   | 204.2252 |
| Tyrosine                    | 60-18-4    | CHEBI:17895 | 243 | C9H11NO3   | HMDB00158 | C00082 | 6057   | 181.1885 |
| Uridine                     | 58-96-8    | CHEBI:16704 | 162 | C9H12N2O6  | HMDB00296 | C00299 | 6029   | 244.2014 |
| Valine                      | 72-18-4    | CHEBI:16414 | 215 | C5H11NO2   | HMDB00883 | C00183 | 6287   | 117.1463 |
| gamma-Glutamylphenylalanine | 7432-24-8  |             | 274 | C14H18N2O5 | HMDB00594 |        | 111299 | 294.3031 |
| pi-Methylhistidine          | 368-16-1   | □           | 76  | C7H11N3O2  | HMDB00479 | C01152 | 64969  | 169.1811 |

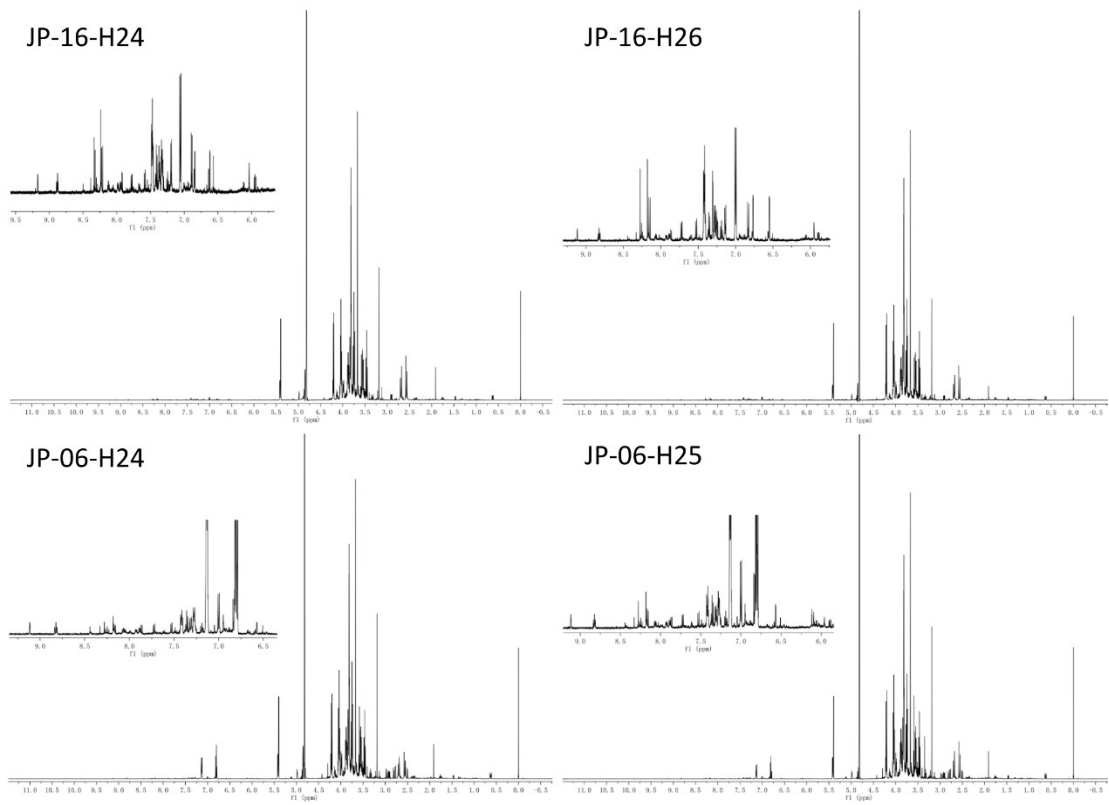

Fig. S1 Representative <sup>1</sup>H NMR spectra of 50% water-methanolic extracts of soybean seed.
